# Supplementary material for: Caffeic Acid Phenethyl Ester Suppresses the Proliferation of Human Prostate Cancer Cells through Inhibition of p70S6K and Akt Signaling Networks
Source: Oxford University Press journal article supplement (doi:10.1158/1940-6207.capr-12-0004-t), 2012-05-01
Supplement: 19406207capr120004t-sup-t3_xls_14k.xls [file 19406207capr120004t-sup-t3_xls_14k.xls]

## Sheet: Supplementary table 1
Supplemental Table 1: This table contains a list of all significantly differentially expressed genes following CAPE treatment.
well	Unigene	Refseq	Symbol	gene.name	P.value	CAPE.control	X95..CI	Fold.Change	NFKB.regulated	array
A01	Hs.12341	NM_001111	ADAR	Adenosine deaminase, RNA-specific	0.002154	0.7342	( 0.63, 0.83 )	-1.3621	0	akt
A02	Hs.525622	NM_005163	AKT1	V-akt murine thymoma viral oncogene homolog 1	0.002051	0.7327	( 0.63, 0.83 )	-1.3647	0	akt
A03	Hs.631535	NM_001626	AKT2	V-akt murine thymoma viral oncogene homolog 2	0.036147	0.6397	( 0.42, 0.86 )	-1.5632	1	akt
A07	Hs.159494	NM_000061	BTK	Bruton agammaglobulinemia tyrosine kinase	0.000992	0.753	( 0.67, 0.84 )	-1.3281	1	akt
A09	Hs.523852	NM_053056	CCND1	Cyclin D1	0.001774	0.7357	( 0.64, 0.83 )	-1.3593	1	akt
A10	Hs.163867	NM_000591	CD14	CD14 molecule	0.007962	0.4229	( 0.22, 0.63 )	-2.3646	0	akt
B02	Hs.644056	NM_001895	CSNK2A1	Casein kinase 2, alpha 1 polypeptide	0.002484	0.7377	( 0.64, 0.84 )	-1.3556	0	akt
B04	Hs.131431	NM_002759	EIF2AK2	Eukaryotic translation initiation factor 2-alpha kinase 2	0.001755	0.7343	( 0.64, 0.83 )	-1.3618	0	akt
B11	Hs.471933	NM_000801	FKBP1A	FK506 binding protein 1A, 12kDa	0.033597	1.6895	( 1.01, 2.37 )	1.6895	0	akt
C08	Hs.37003	NM_005343	HRAS	V-Ha-ras Harvey rat sarcoma viral oncogene homolog	0.039556	0.558	( 0.30, 0.82 )	-1.792	1	akt
D04	Hs.714791	NM_002228	JUN	Jun oncogene	0.025203	1.6948	( 1.06, 2.33 )	1.6948	1	akt
E01	Hs.81328	NM_020529	NFKBIA	Nuclear factor of kappa light polypeptide gene enhancer in B-cells inhibitor, alpha	0.03989	2.2523	( 0.79, 3.71 )	2.2523	1	akt
E04	Hs.74615	NM_006206	PDGFRA	Platelet-derived growth factor receptor, alpha polypeptide	0.028314	0.6531	( 0.45, 0.86 )	-1.5311	1	akt
F01	Hs.460355	NM_002738	PRKCB	Protein kinase C, beta	0.005141	0.7615	( 0.65, 0.87 )	-1.3132	0	akt
F09	Hs.513609	NM_005611	RBL2	Retinoblastoma-like 2 (p130)	0.009398	1.6882	( 1.18, 2.20 )	1.6882	0	akt
F11	Hs.247077	NM_001664	RHOA	Ras homolog gene family, member A	0.001751	0.7364	( 0.64, 0.83 )	-1.358	0	akt
G01	Hs.463642	NM_003161	RPS6KB1	Ribosomal protein S6 kinase, 70kDa, polypeptide 1	0.012369	0.5526	( 0.35, 0.75 )	-1.8096	0	akt
G06	Hs.537126	NM_001039661	TIRAP	Toll-interleukin 1 receptor (TIR) domain containing adaptor protein	0.033165	1.7001	( 1.01, 2.39 )	1.7001	0	akt
G07	Hs.174312	NM_138554	TLR4	Toll-like receptor 4	0.001838	0.7451	( 0.65, 0.84 )	-1.3421	1	akt
A01	Hs.525622	NM_005163	AKT1	V-akt murine thymoma viral oncogene homolog 1	0.015875	0.5526	( 0.35, 0.76 )	-1.8097	0	cancer
A04	Hs.552567	NM_001160	APAF1	Apoptotic peptidase activating factor 1	0.041899	0.7948	( 0.64, 0.95 )	-1.2582	0	cancer
A08	Hs.150749	NM_000633	BCL2	B-cell CLL/lymphoma 2	0.001855	3.3035	( 1.65, 4.96 )	3.3035	1	cancer
A10	Hs.194143	NM_007294	BRCA1	Breast cancer 1, early onset	0.009679	0.2223	( 0.02, 0.42 )	-4.4993	1	cancer
B04	Hs.370771	NM_000389	CDKN1A	Cyclin-dependent kinase inhibitor 1A (p21, Cip1)	0.041474	2.2044	( 0.88, 3.53 )	2.2044	1	cancer
B09	Hs.654393	NM_005225	E2F1	E2F transcription factor 1	0.036138	0.4933	( 0.22, 0.76 )	-2.0274	0	cancer
C04	Hs.90753	NM_006410	HTATIP2	HIV-1 Tat interactive protein 2, 30kDa	0.006668	1.872	( 1.19, 2.55 )	1.872	0	cancer
C06	Hs.93177	NM_002176	IFNB1	Interferon, beta 1, fibroblast	0.000231	4.4697	( 2.42, 6.52 )	4.4697	1	cancer
C08	Hs.624	NM_000584	IL8	Interleukin 8	0.017369	2.8347	( 0.78, 4.89 )	2.8347	1	cancer
C12	Hs.694732	NM_000885	ITGA4	Integrin, alpha 4 (antigen CD49D, alpha 4 subunit of VLA-4 receptor)	0.044278	1.9092	( 0.93, 2.89 )	1.9092	0	cancer
D01	Hs.436873	NM_002210	ITGAV	Integrin, alpha V (vitronectin receptor, alpha polypeptide, antigen CD51)	0.044246	2.1546	( 0.79, 3.52 )	2.1546	1	cancer
D04	Hs.536663	NM_002213	ITGB5	Integrin, beta 5	0.012651	2.1949	( 1.18, 3.21 )	2.1949	0	cancer
D10	Hs.83169	NM_002421	MMP1	Matrix metallopeptidase 1 (interstitial collagenase)	0	3.6737	( 3.04, 4.30 )	3.6737	1	cancer
D11	Hs.513617	NM_004530	MMP2	Matrix metallopeptidase 2 (gelatinase A, 72kDa gelatinase, 72kDa type IV collagenase)	0	3.6263	( 2.96, 4.29 )	3.6263	0	cancer
D12	Hs.297413	NM_004994	MMP9	Matrix metallopeptidase 9 (gelatinase B, 92kDa gelatinase, 92kDa type IV collagenase)	0.000281	4.5304	( 2.39, 6.67 )	4.5304	1	cancer
E04	Hs.202453	NM_002467	MYC	V-myc myelocytomatosis viral oncogene homolog (avian)	0.015546	0.2628	( 0.05, 0.48 )	-3.8049	1	cancer
E05	Hs.654408	NM_003998	NFKB1	Nuclear factor of kappa light polypeptide gene enhancer in B-cells 1	0.008732	2.0652	( 1.15, 2.98 )	2.0652	1	cancer
E06	Hs.81328	NM_020529	NFKBIA	Nuclear factor of kappa light polypeptide gene enhancer in B-cells inhibitor, alpha	0.001378	2.6464	( 1.54, 3.75 )	2.6464	1	cancer
F06	Hs.55279	NM_002639	SERPINB5	Serpin peptidase inhibitor, clade B (ovalbumin), member 5	0.000607	4.7269	( 2.17, 7.29 )	4.7269	1	cancer
F07	Hs.414795	NM_000602	SERPINE1	Serpin peptidase inhibitor, clade E (nexin, plasminogen activator inhibitor type 1), member 1	0.005375	3.4318	( 1.17, 5.70 )	3.4318	1	cancer
F11	Hs.492203	NM_198253	TERT	Telomerase reverse transcriptase	0.005197	0.2715	( 0.08, 0.46 )	-3.6837	1	cancer
G02	Hs.164226	NM_003246	THBS1	Thrombospondin 1	0.045601	1.6811	( 0.95, 2.41 )	1.6811	1	cancer
G05	Hs.241570	NM_000594	TNF	Tumor necrosis factor (TNF superfamily, member 2)	0.00243	3.8252	( 1.44, 6.22 )	3.8252	1	cancer
G10	Hs.66744	NM_000474	TWIST1	Twist homolog 1 (Drosophila)	0	3.6342	( 2.97, 4.30 )	3.6342	1	cancer
